# Supplementary material for: Enhanced catabolism of branched-chain amino acids uncouples anti-inflammatory and antioxidant functions in liver macrophages
Source: Research Square preprint supplement (doi:10.21203/rs.3.rs-8077254/v1), 2025-12-11
Supplement: Supplementary file 1 [file 150b72329341548de37634d4.docx]

| **Antibody** | **Commercial supplier** | **Catalogue #** | **2° antibody** |
| --- | --- | --- | --- |
| **GAPDH** | Calbiochem | CB1001 | Mouse |
| **mnSOD** | Stressgen Biotechnologies | SOD-111 | Rabbit |
| **NRF-2** | GeneTex | GTX103322 | Rabbit |
| **HMGB1** | Cell Signaling Technology | 6393 | Rabbit |
| **PARP1** | Cell Signaling Technology | 9542 | Rabbit |
| **p-p65** | Cell Signaling Technology | 3033 | Rabbit |
| **p-p38** | Cell Signaling Technology | 9211 | Rabbit |
| **β-actin** | Cell Signaling Technology | 4970 | Rabbit |
| **S6K** | Cell Signaling Technology | 9202S | Rabbit |
| **p-4E-BP1** | Cell Signaling Technology | 2855 | Rabbit |
| **BCAT1** | Thermo Fisher Scientific | PA5-120441 | Rabbit |
| **BCKDH** | Thermo Fisher Scientific | A700-060 | Rabbit |
| **PDH3** | Novus Biologicals | NB1000-139 | Rabbit |

**Table 1.** List of primary antibodies.

| **Rat primers** | | | |
| --- | --- | --- | --- |
| **Gene** | **Forward** | **Reverse** | **Probe** |
| **18s** | CGGCTACCACATCCAAGGA | CCAATTACAGGGCCTCGAAA | CGCGCAAATTACCCACTCCCGA |
| **SOD2** | CACCGAGGAGAAGTACCACGA | GAACTTCAGTGCAGGCTGAAGA | CCTGAGTTGTAACATCTCCCTTGGCCAG |
| **NRF-2** | AGCCCAGCACATCCAGACA | TGTCTCTGCCAAAAGCTGCAT | TCAGCTACTCCCAGGTTGCCCACATTC |
| **iNOS** | CTATCTCCATTCTACTACTACCAGATCGA | CCTGGGCCTCAGCTTCTCAT | CCCTGGAAGACCCACATC TGGCAG |
| **Arg-1** | AGCTGGGAATTGGCAAAGTG | TCCAGTCCATCAACATCAAAACTC | AATGGGCCTTTTCTTCCTTCCCAGCAG |
| **IL-1b** | ACCCTGCAGCTGGAGAGTGT | TTGACTTCTATCTTGTTGAAGACAAACC | CCCAAACAATACCCAAAGAAGAAGATGGAAAAG |
| **IL-6** | CCGGAGAGGAGACTTCACAGA | AGAATTGCCATTGCACAACTCTT | ACCACTTCACAAGTCGGAGGCTTAATTACA |
| **IL-10** | TGCAGGACTTTAAGGGTTACTTGG | CAGGGAATTCAAATGCTCCTTG | TCTCTGCCTGGGGCATCACTTCTACCA |
| **TNF-α** | GTAGCCCACGTCGTAGCAAAC | AGTTGGTTGTCTTTGAGATCCATG | CGCTGGCTCAGCCACTCCAGC |
| **BCKDH** | CACGATCTGATTGG CATTGG | AGCGTCACTTCGTCA CCATTT | CCTACCGCCTGAGGG ATCTGCGT |
| **BCAT1** | GAAGAACGCATTGC AGAAGCT | GGCCGGACCTCAACATGA | TCAAACTCCGGCAGAGTGGTCCTCA |
| **HIF-1** | GCTTCGCTGCGTGTTTTGT | GTGACCATGAGGAAATGAGAGAAAT | TCCCCTTTCTCACTGGGCCATTTCTGT |
| **MCP-1** | TGTCTCAGCCAGATGCAGTTAAT | CCGACTCATTGGGATCATCTT | CCCCACTCACCTGCTGCTACTCATTCA |
| **NLRP3** | GTGCGTGGGACTGAAGCAT | CTGACAACACGCAGATGTGAGA | AGCAGCTGACCAACCAGAGTTTCTGCA |
| **CAS-1** | CGGAGTTTCCTACTGAATCTTTTAACA | GAAAGACAAGCCCAAGGTTATCA | ACCACTCCTTGTTTCTCTCCACGGCA |
| **BCAT2** | CCTATTCCCTGGCG TCTATGTG | TGGCTCTCTGGTCAC CTGAAC | CTCCAACTTCAAGGC GGCAGACCTC |
| **CD11b** | TTCCCTGTCAGCGTGGTCTT | TGCTCAGTGCGACAGACACTT | CCCAGGTCACCTTCTCCCAGAACCTCT |

**Table 2.** List of primers and probes

**
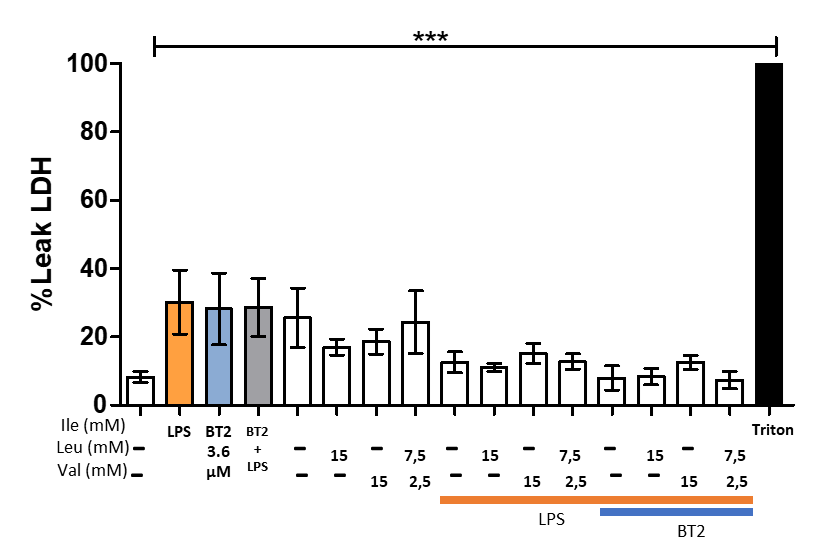

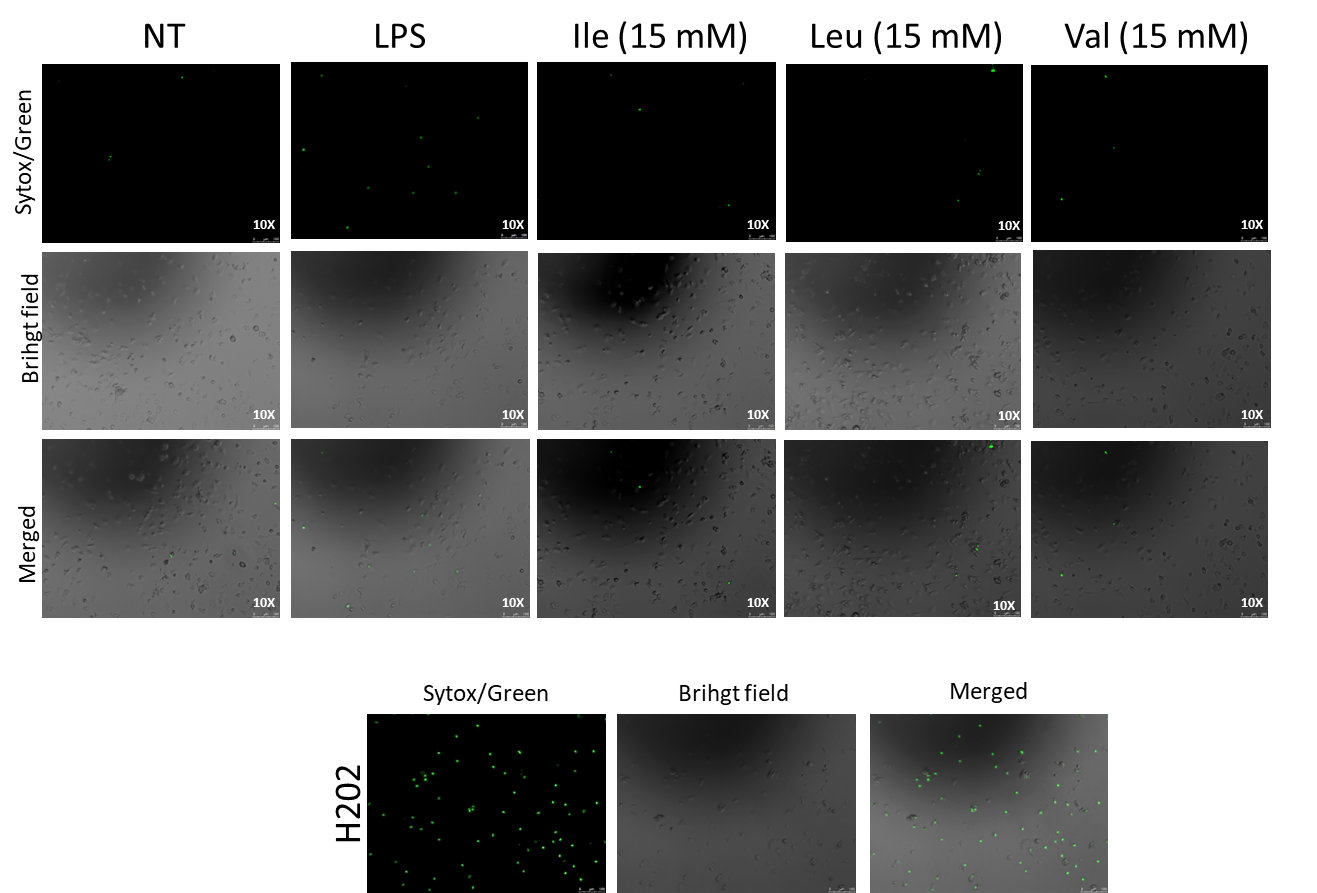
 Supplementary Figure 1. BCAA effects on cell survival.** Primary RLMs were incubated with LPS (100 ng/mL) alone or with 15 mM of individual BCAAs (Ile, Leu, Val). **A)** Representative images using Sytox green solution observed under a fluorescent microscope (10x). As a positive control for cell death, hydrogen peroxide was added in one well 10 minutes prior to the conclusion of the experiment. **B)** LDH release was calculated as the percentage of the activity of LDH released in the medium vs. the total LDH activity. Triton X-100 was used as a positive control for total LDH leakage. Data are mean ± SEM of *n* = 4. Statistical analysis was performed using one-way ANOVA followed by Tukey’s post hoc test. Significance compared with LPS alone is indicated as p < 0.05 (*), p < 0.01 (**), p < 0.001 (***), and p < 0.0001 (****). Abbreviations: BCAA, branched-chain amino acids; Ile, isoleucine; Leu, leucine; Val, valine; LPS, lipopolysaccharide.

10µM

10µM

**B)**

**A)**


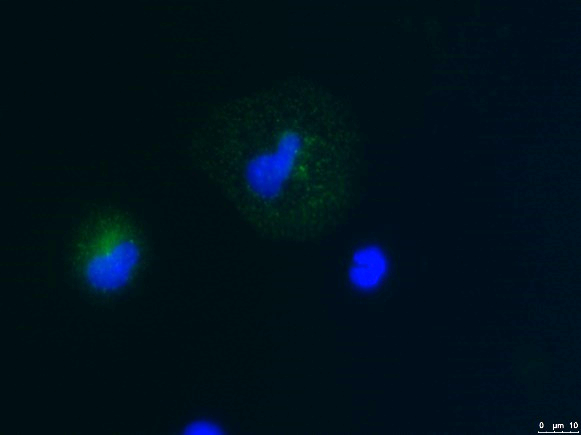


**A)**


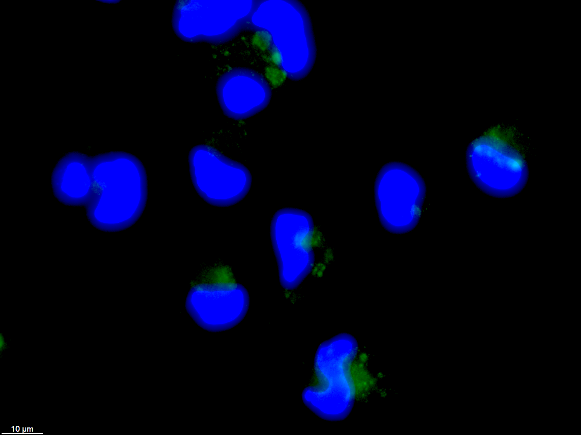


**B)**

**Supplementary Figure 2. Expression of classical macrophage markers in resident liver macrophages (RLMs).** RLMs were seeded on glass coverslips, fixed with 4% paraformaldehyde, permeabilized, and blocked prior to immunostaining. Cells were incubated with primary antibodies against CD163 (green, panel A) or CD68 (green, panel B), followed by Alexa Fluor–conjugated secondary antibodies. Nuclei were counterstained with DAPI (blue). Coverslips were mounted in fluorescence medium and imaged using a Leica DMI6000 fluorescence microscope at 60× magnification

**Supplementary Figure 3.** **Gene expression of BCAA-metabolizing enzymes in liver cell populations.** Quantitative PCR analysis of the fold change expression of BCAT1, BCAT2, and BCKDH in hepatocytes (HEP), stellate cells (HSC), liver sinusoidal endothelial cells (LSECs), and resident liver macrophages (RLMs). Data are presented as average Ct values and are mean ± SEM of n = 3-4. BCAT1, Branched-chain amino acid transaminase 1; BCAT2, Branched-chain amino acid transaminase 2; BCKDH, Branched-chain α-ketoacid dehydrogenase.


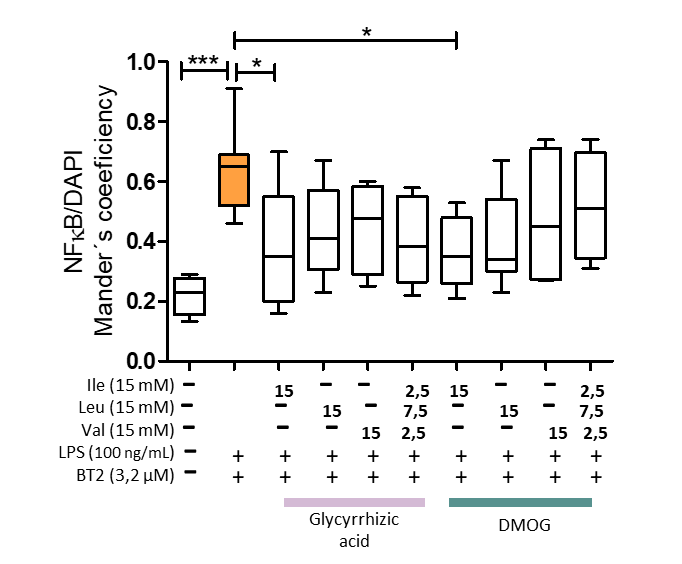

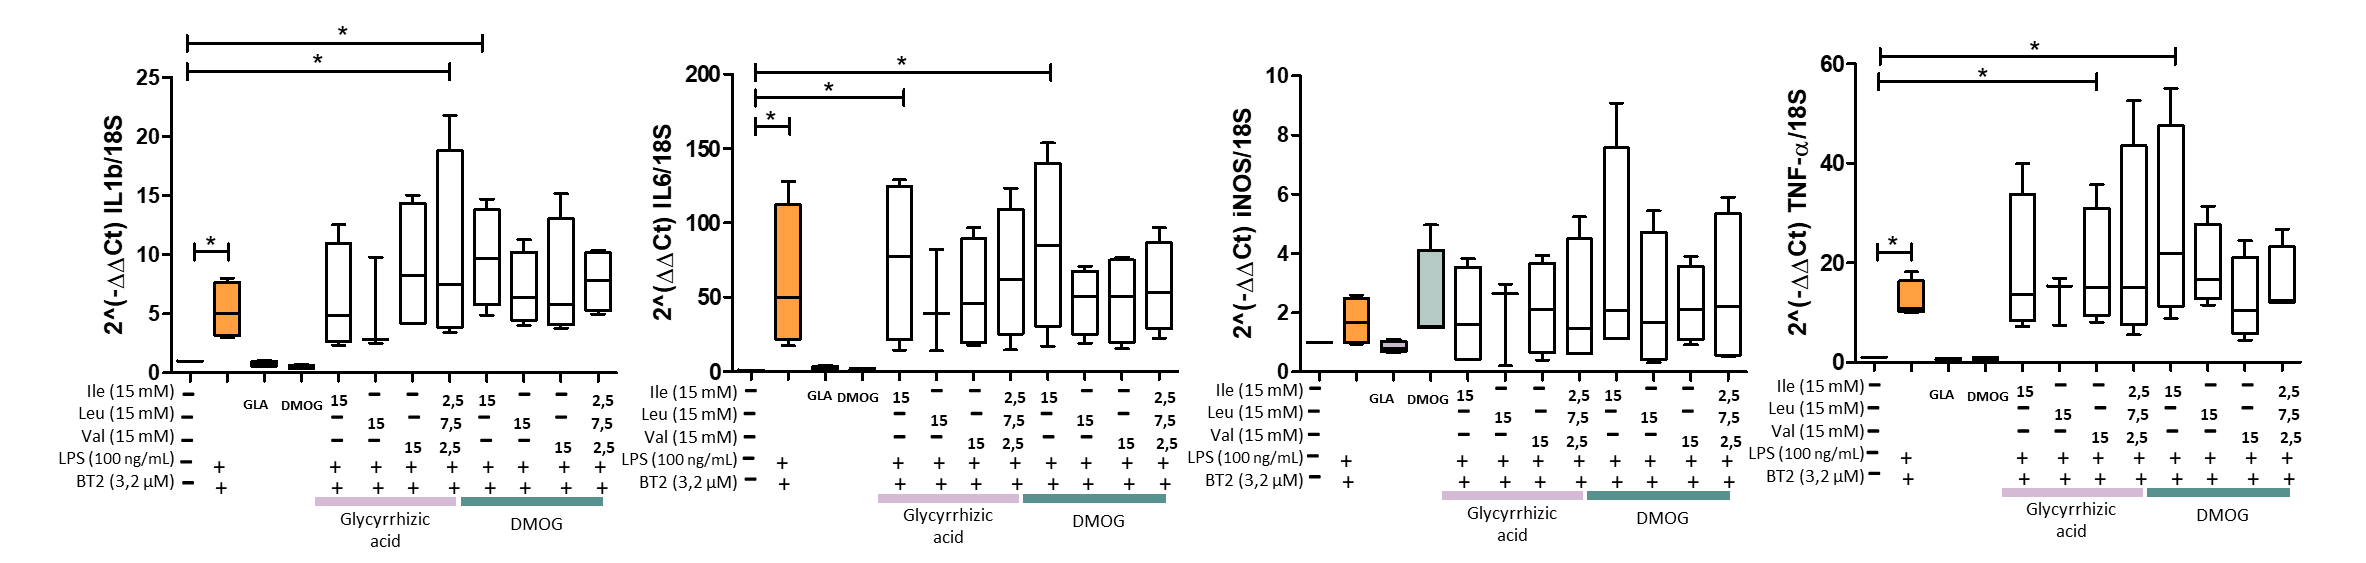


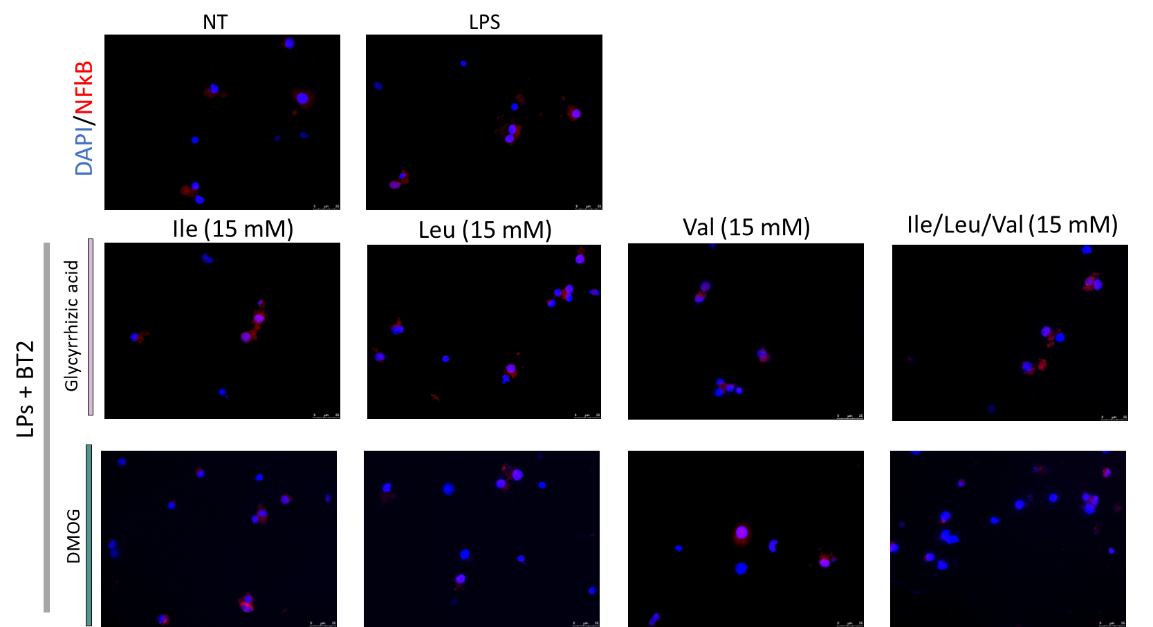


**B)**

**C)**

**A)**

**Supplementary Figure 4. Gene expression and NF-kB expression after DMOG and glycyrrhizic acid treatment.** RLMstreated with BCAAs (alone or as a mixture), LPS (100 ng/mL), and BT2 with the HMGB1 (Gla) or the HIF1α (DMOG) inhibitor. **A)** mRNA expression (fold-change, 2^–ΔΔCt) of M1 (CD11b, MCP1, IL-1β, IL-6, iNOS, TNFα, HIF-1α) and M2 (IL-10, Arginase-1) phenotype-related genes. **B-C)** NF-κB nuclear translocation. Immunofluorescence staining of NF-κB (red) and nuclei (DAPI, blue) (B) and quantification of colocalization using Manders’ coefficient(C). Scale bar = 40 µm. Data are mean ± SEM of n = 4. Statistical analysis was performed using one-way ANOVA followed by Tukey’s post hoc test. Significance compared with LPS alone is indicated as p < 0.05 (*), p < 0.01 (**), p < 0.001 (***). Abbreviations: BCAA, branched-chain amino acids; Ile, isoleucine; Leu, leucine; Val, valine or combination (2:1:1 ratio) in the presence of LPS and BT2 with glycyrrhizic acid or DMOG. A) mRNA expression of pro-; LPS, lipopolysaccharide; TNFα, tumor necrosis factor alpha; iNOS, inducible nitric oxide synthase; IL, interleukin; BT2, 3,6-dichlorobenzothiophene-2-carboxylic acid.


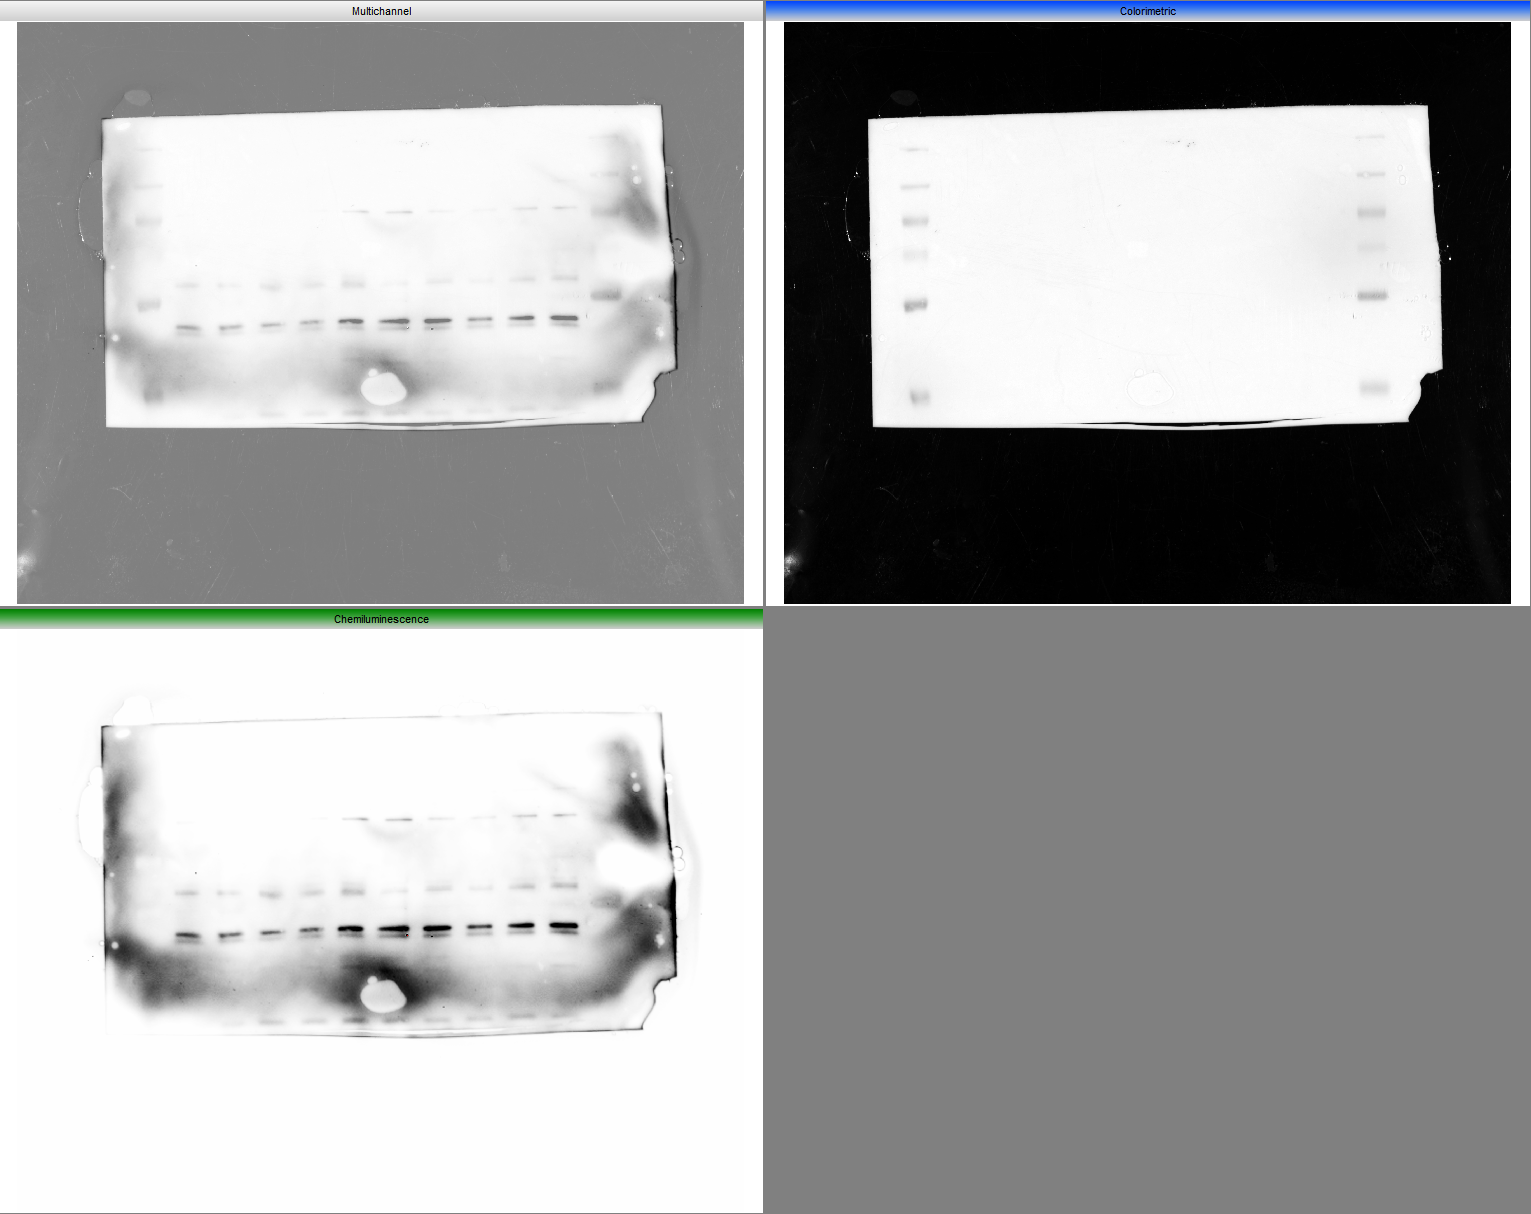


BCAT1 ~45 kDa


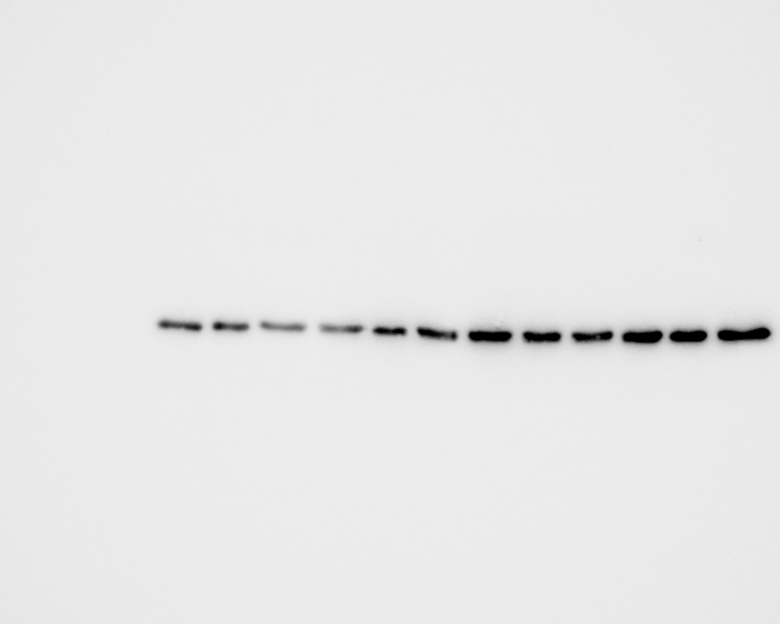


GAPDH ~45 kDa


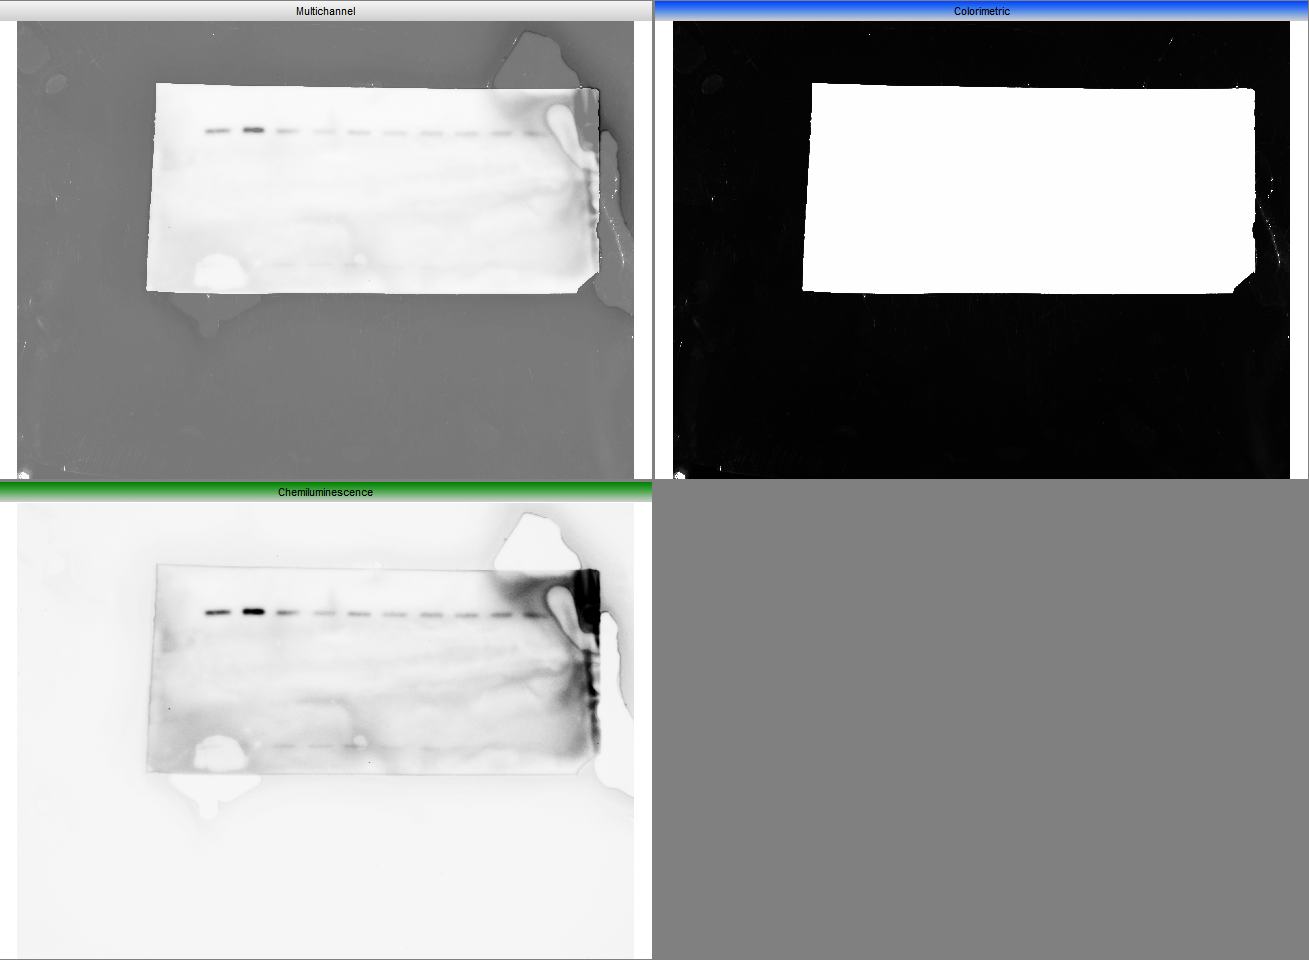


BCKDH ~65 kDa

**Western blots Figure 1**. Primary rat RLMs were pre-treated with BCAAs (Ile, leu, val) alone or as a mixture (1:2:1 ratio) (15 mM) for 2 h and then co-treated with LPS (100 ng/mL) for 4 h. This figure shows the protein bands of BCAT1, BCKDH and GAPDH in complete western blot membranes. IBCAT1 shows multiple banding but only the one closer to the reported molecular weight was consider.


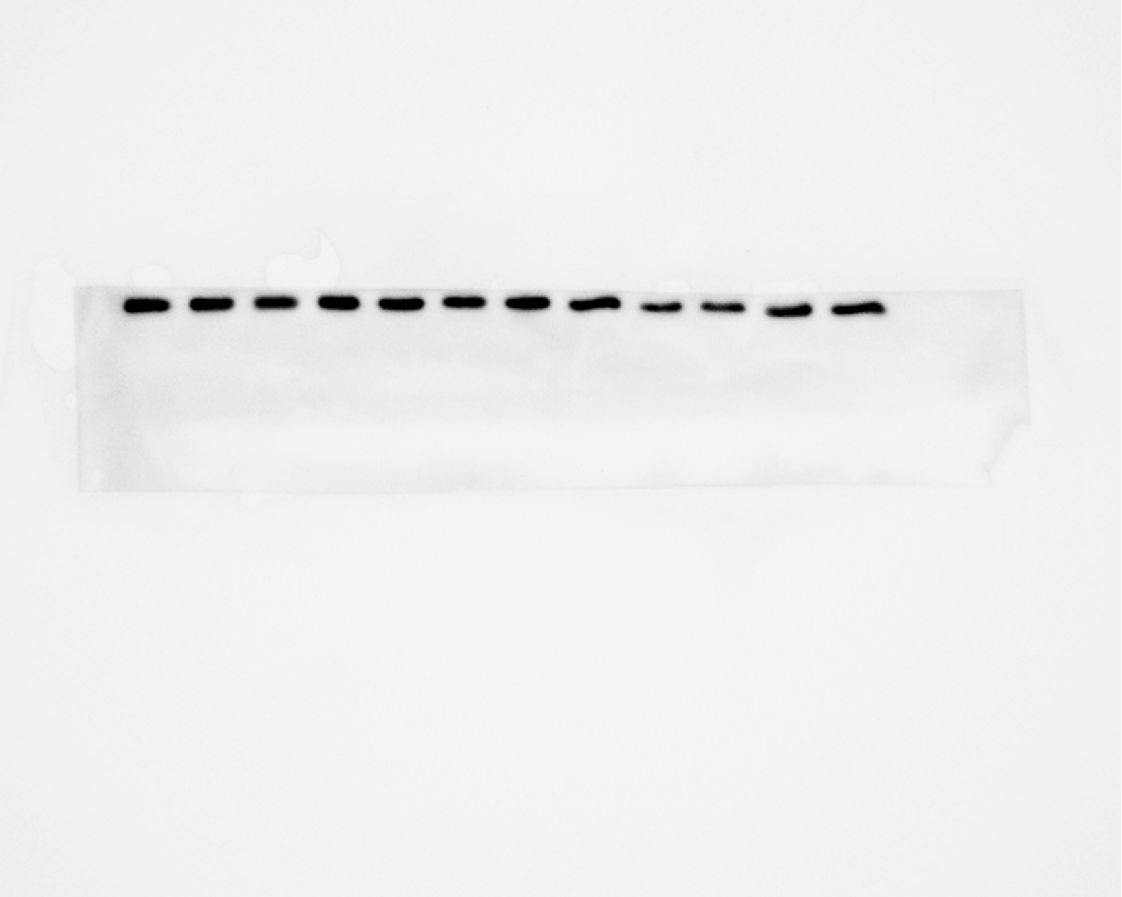

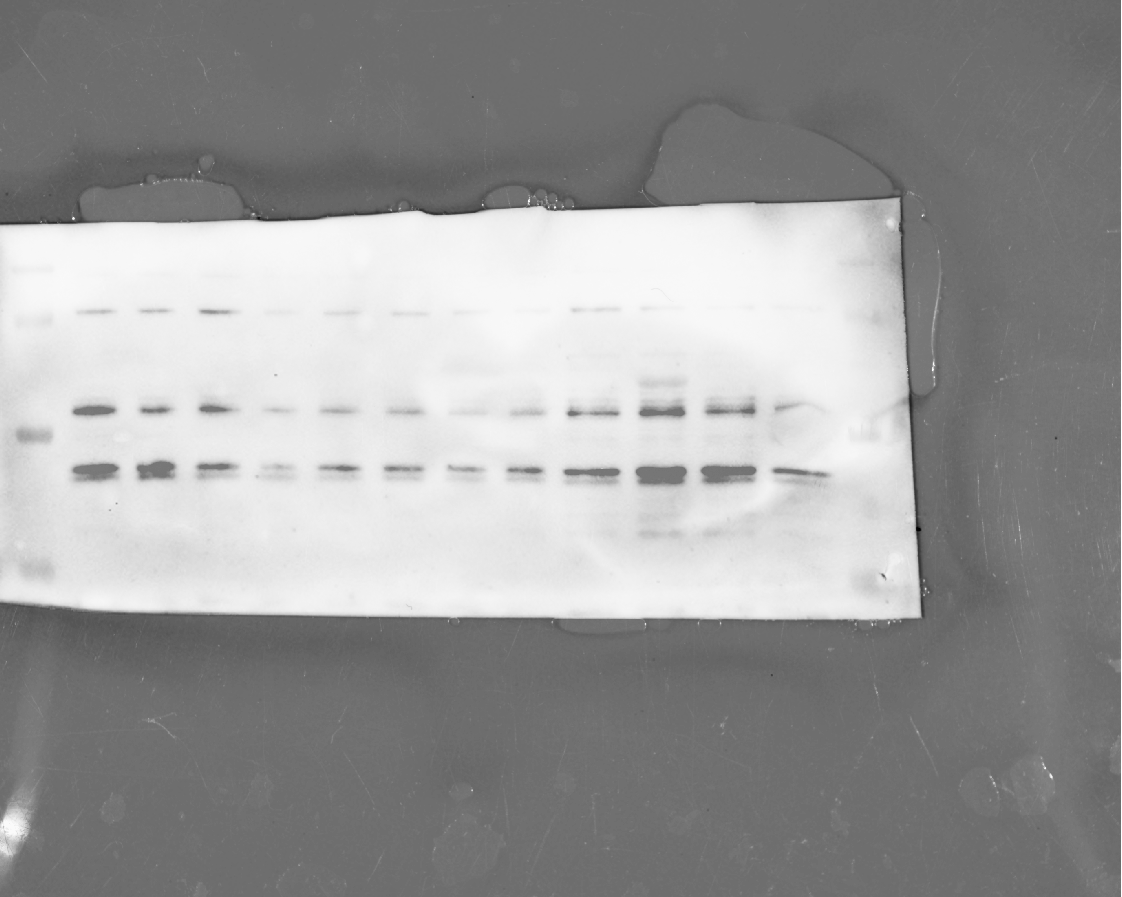

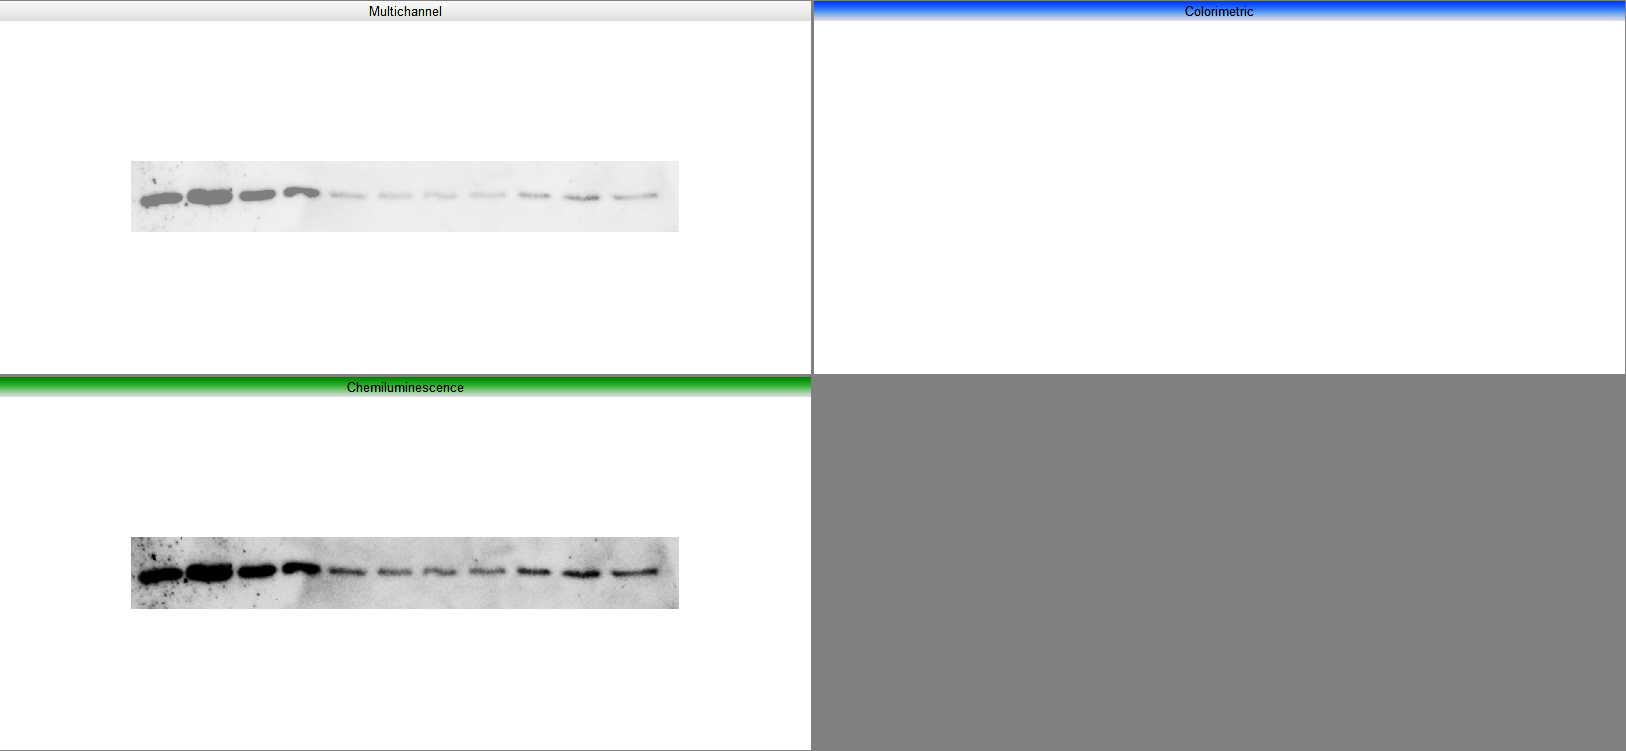


BCAT1 ~45 kDa

β-actin ~45 kDa

BCKDH ~65 kDa

**Western blots Figure 3**. Primary rat RLMs were pre-treated with BT2 for 30 minutes and then added BCAAs (Ile, leu, val) alone or as a mixture (1:2:1 ratio) (15 mM) for 2 h and then co-treated with LPS (100 ng/mL). This figure shows the protein bands of BCAT1, BCKDH and β-actin in complete western blot membranes. IBCAT1 shows multiple banding but only the one closer to the reported molecular weight was consider.


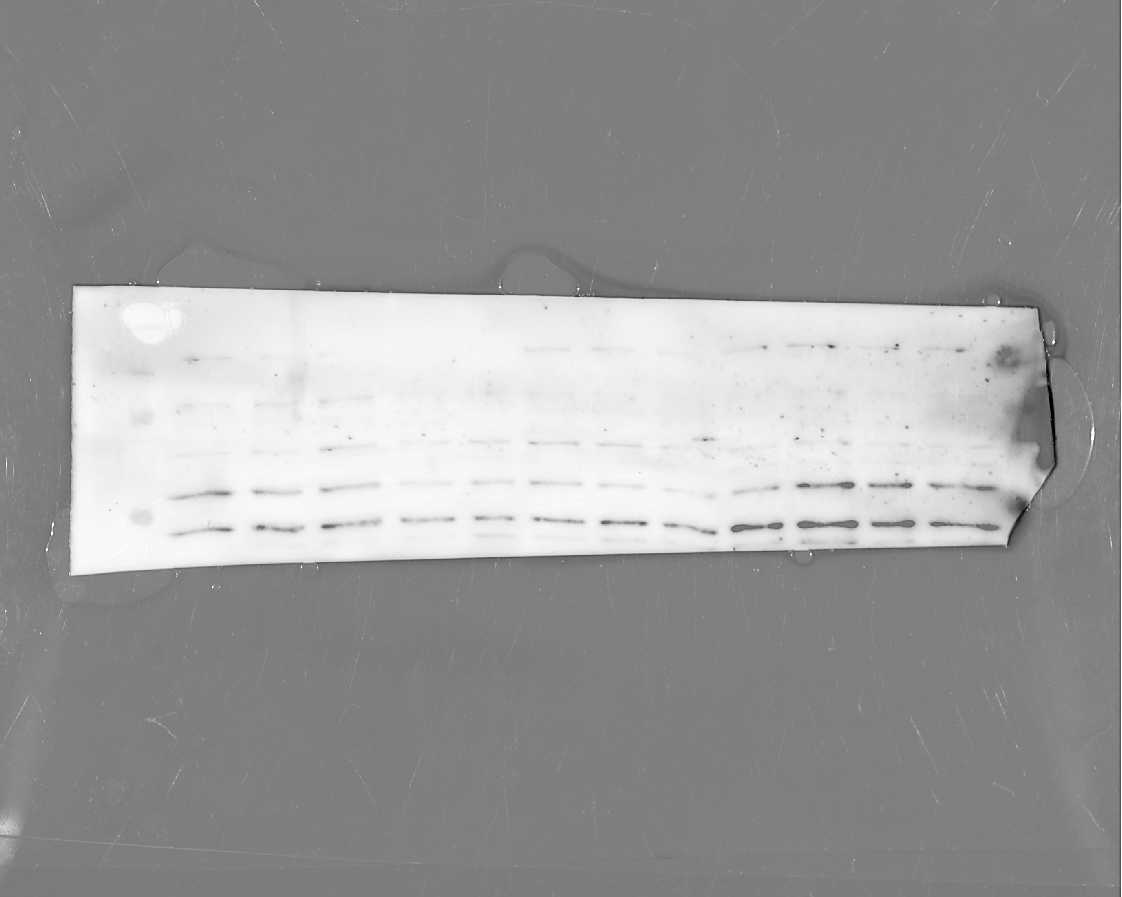


NRF2 ~65-110 kDa


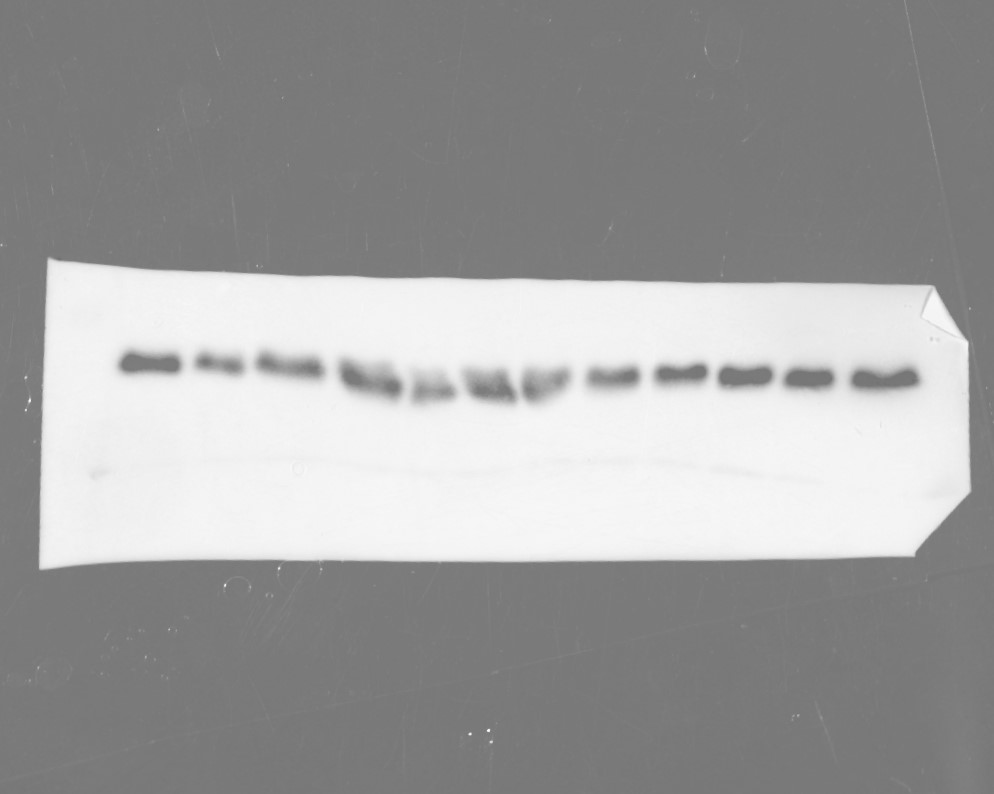


MnSOD ~25 kDa


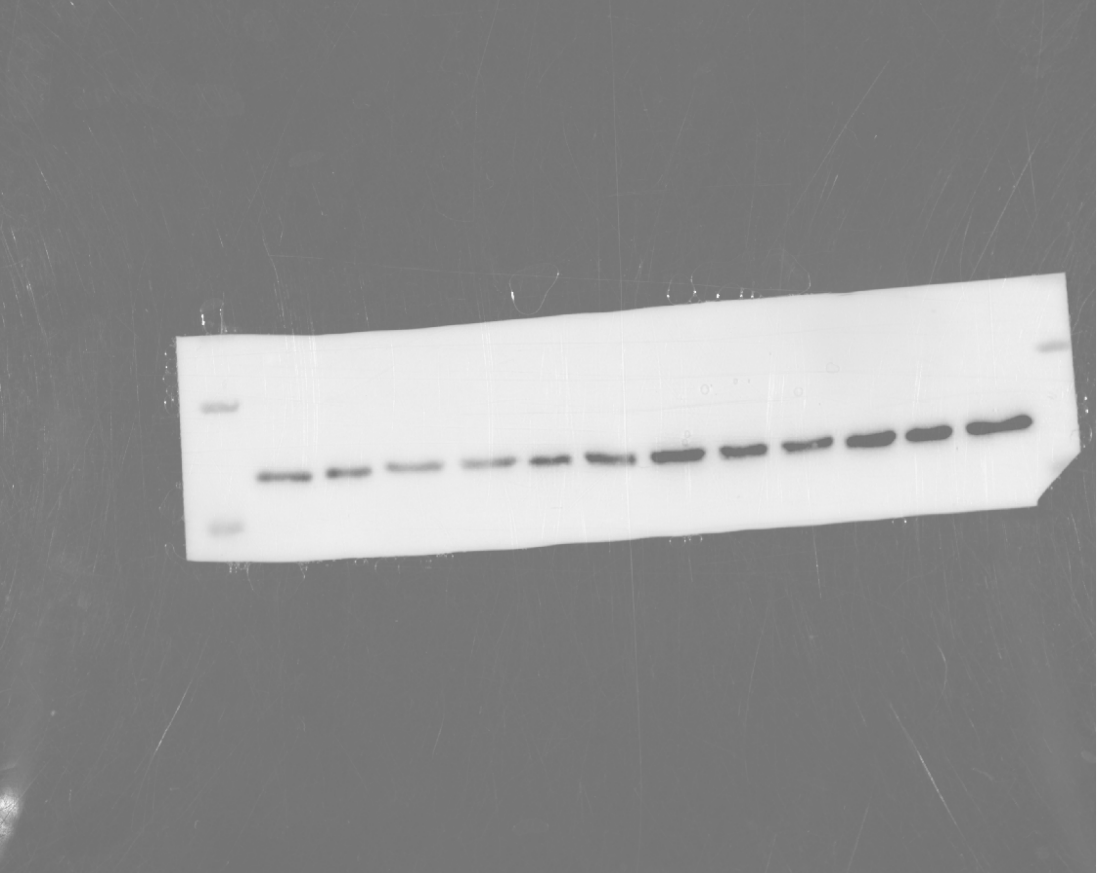


β-actin ~45 kDa

GAPDH

**Western blots Figure 5**. Primary rat RLMs were pre-treated with BT2 for 30 minutes and then added BCAAs (Ile, leu, val) alone or as a mixture (1:2:1 ratio) (15 mM) for 2 h and then co-treated with LPS (100 ng/mL). This figure shows the protein bands of NRF2, MnSOD (SOD2) and β-actin in complete western blot membranes. IBCAT1 shows multiple banding but only the one closer to the reported molecular weight was consider.


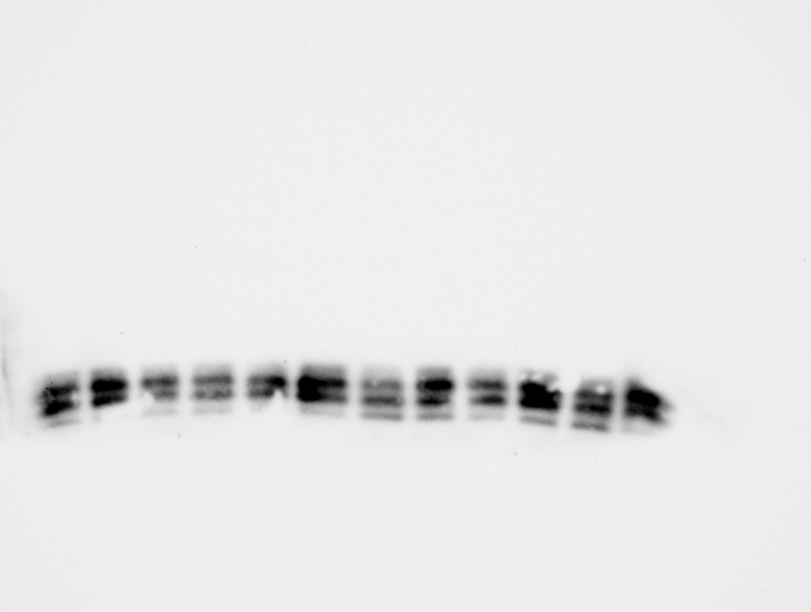

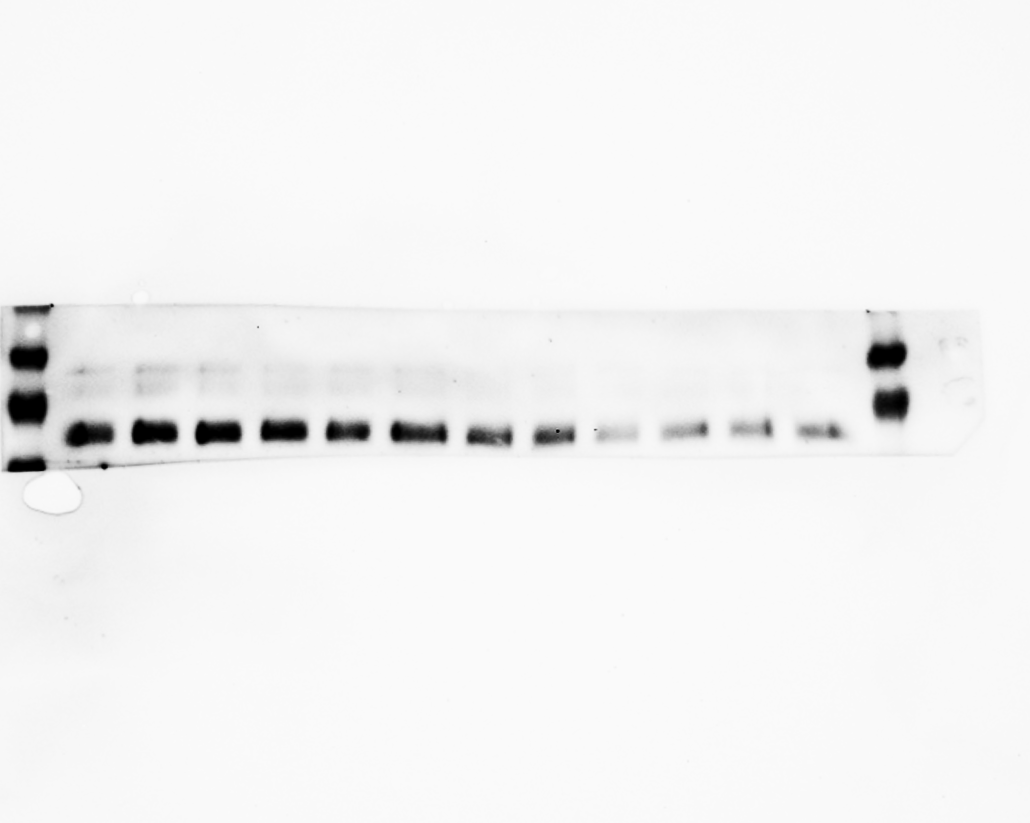

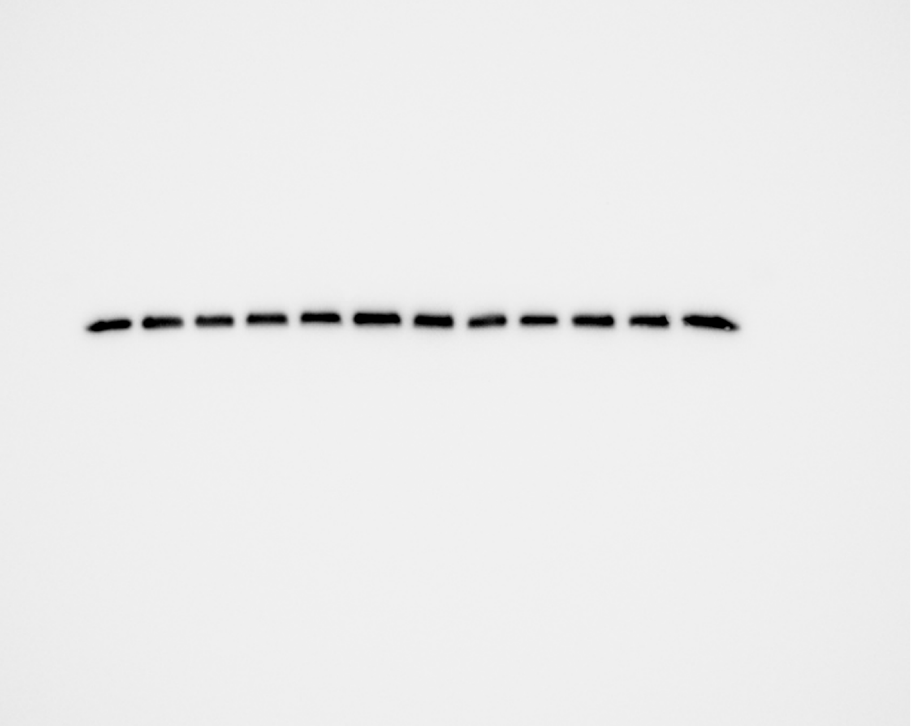

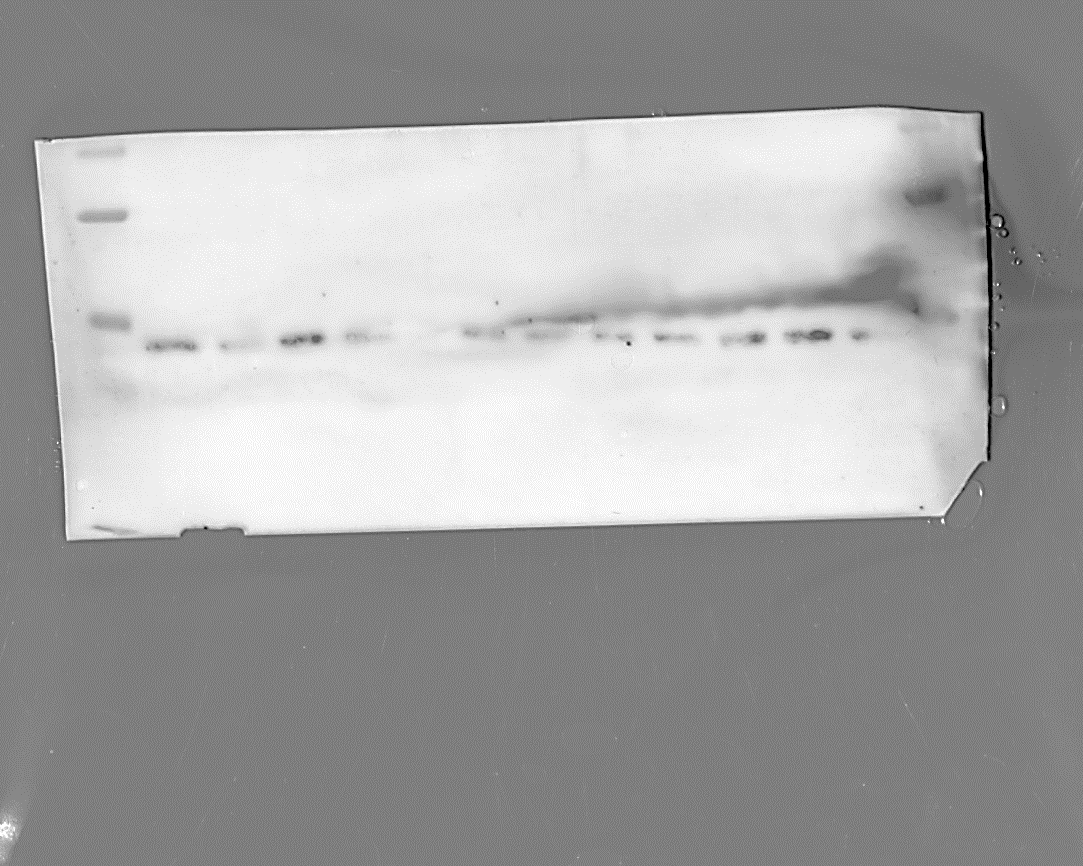

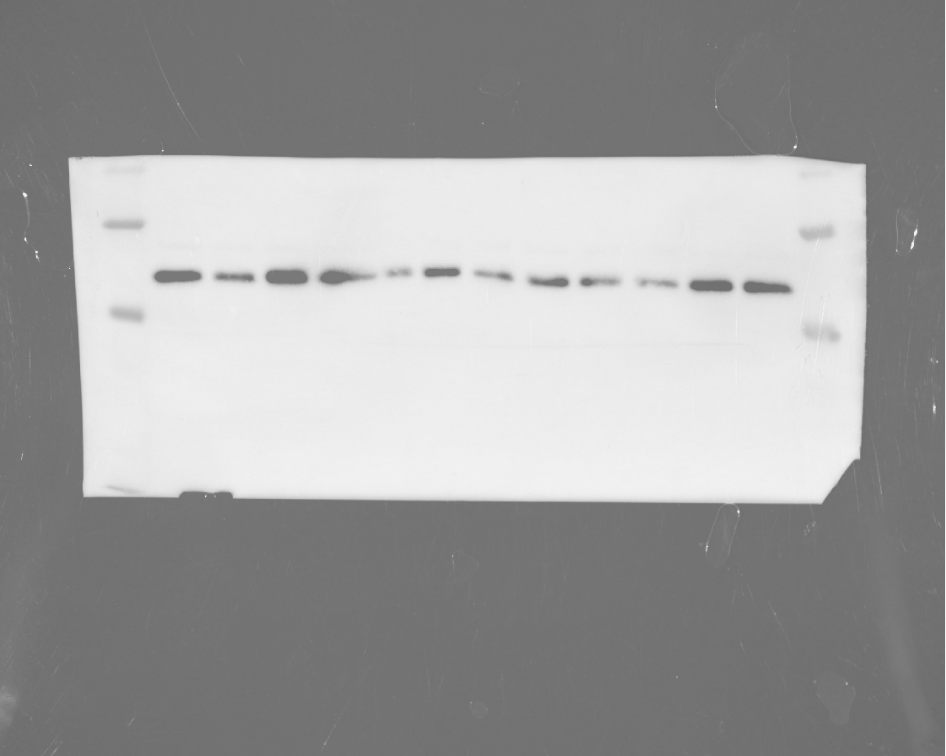

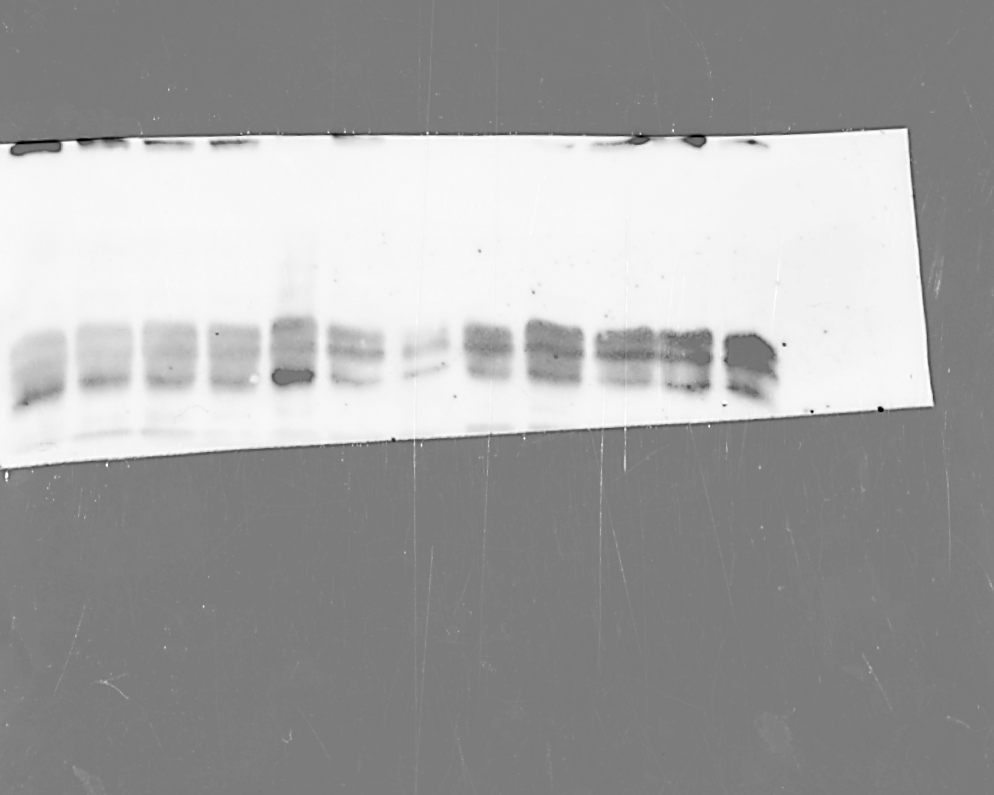

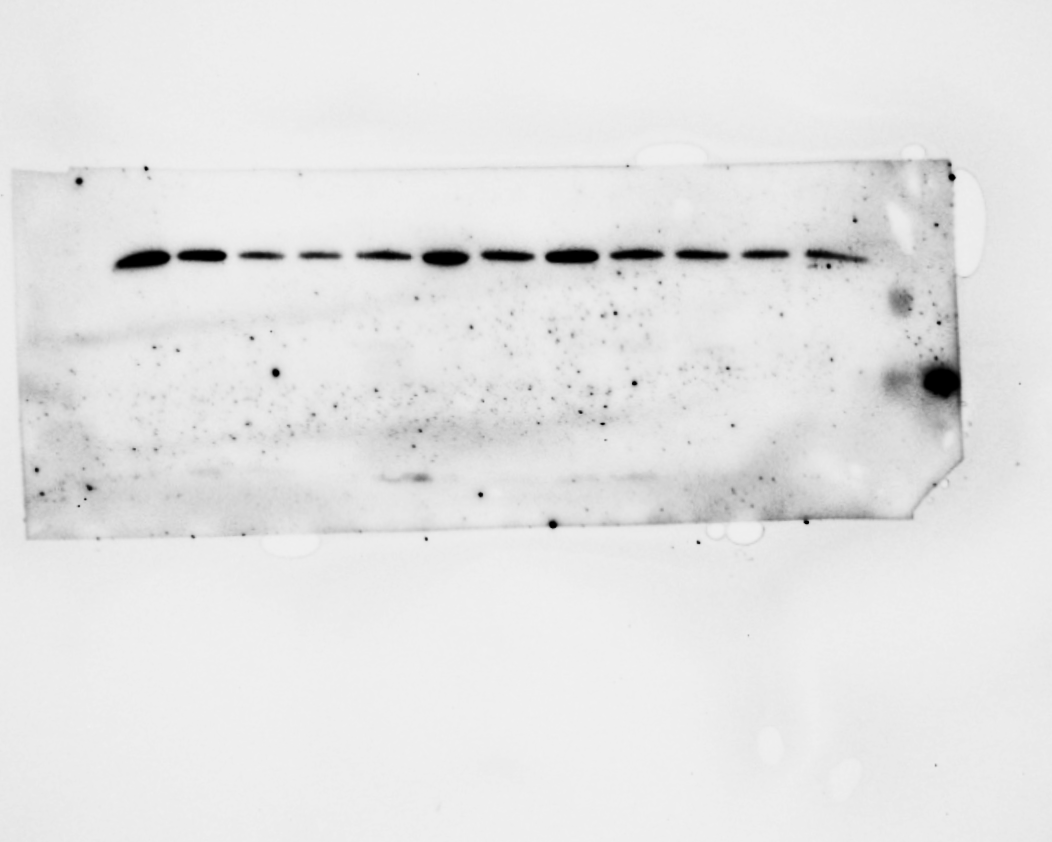


HMGB1 ~30 kDa

GAPDH ~45 kDa

Supernatant HMGB1 ~20 kDa

PDH3 ~100 kDa

S6k ~70 kDa

GAPDH ~45 kDa

4E-BP ~15 kDa


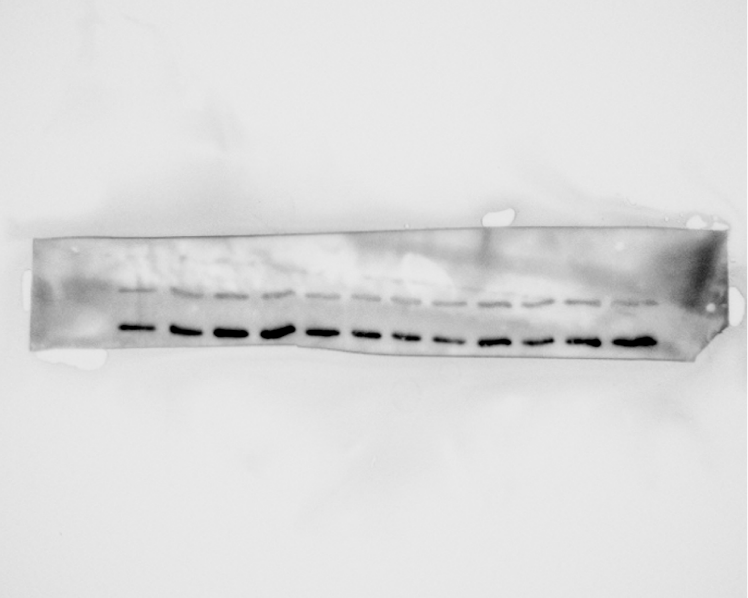


GAPDH ~45 kDa

**C)**

**B)**

**A)**

**Western blots Figure 6**. Primary rat RLMs were pre-treated with BT2 for 30 minutes and then added BCAAs (Ile, leu, val) alone or as a mixture (1:2:1 ratio) (15 mM) for 2 h and then co-treated with LPS (100 ng/mL). This figure shows the protein bands of mTOR-related proteins 4E-BP, S6K and GAPDH (A), HIF-1α regulatory protein PDH3 and GAPDH (B) and HMGB1 in whole cell and supernatant (C).


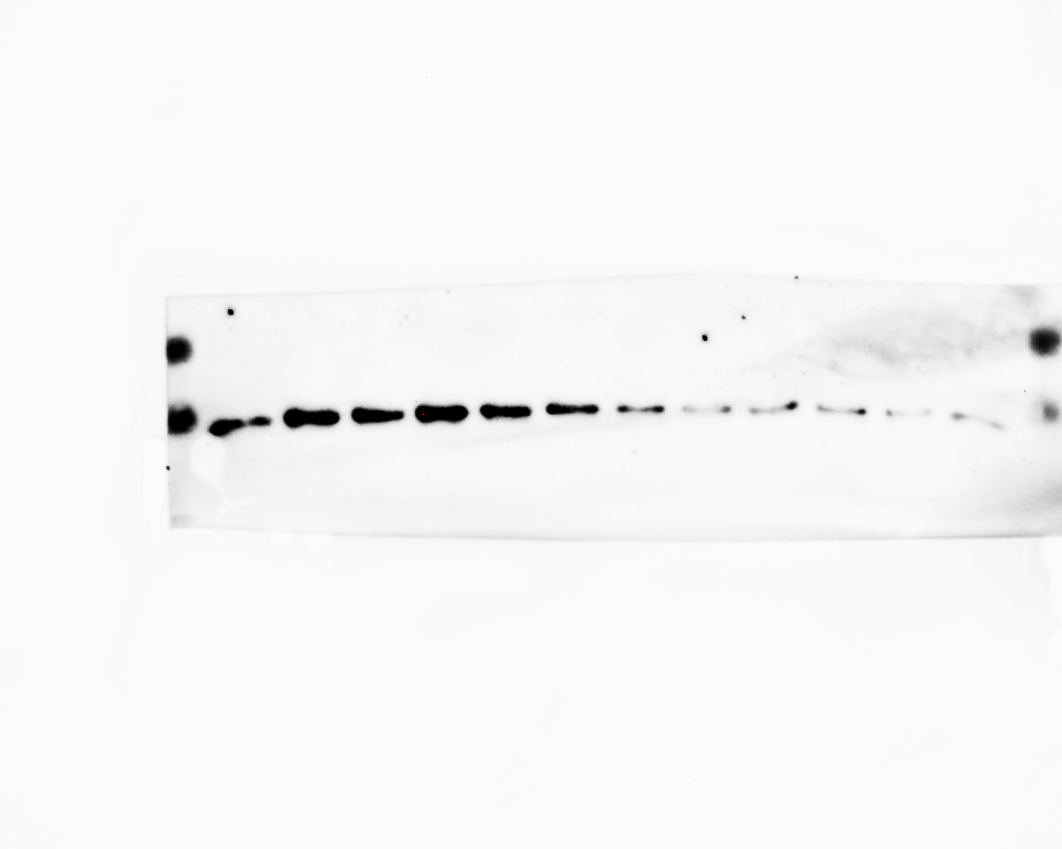

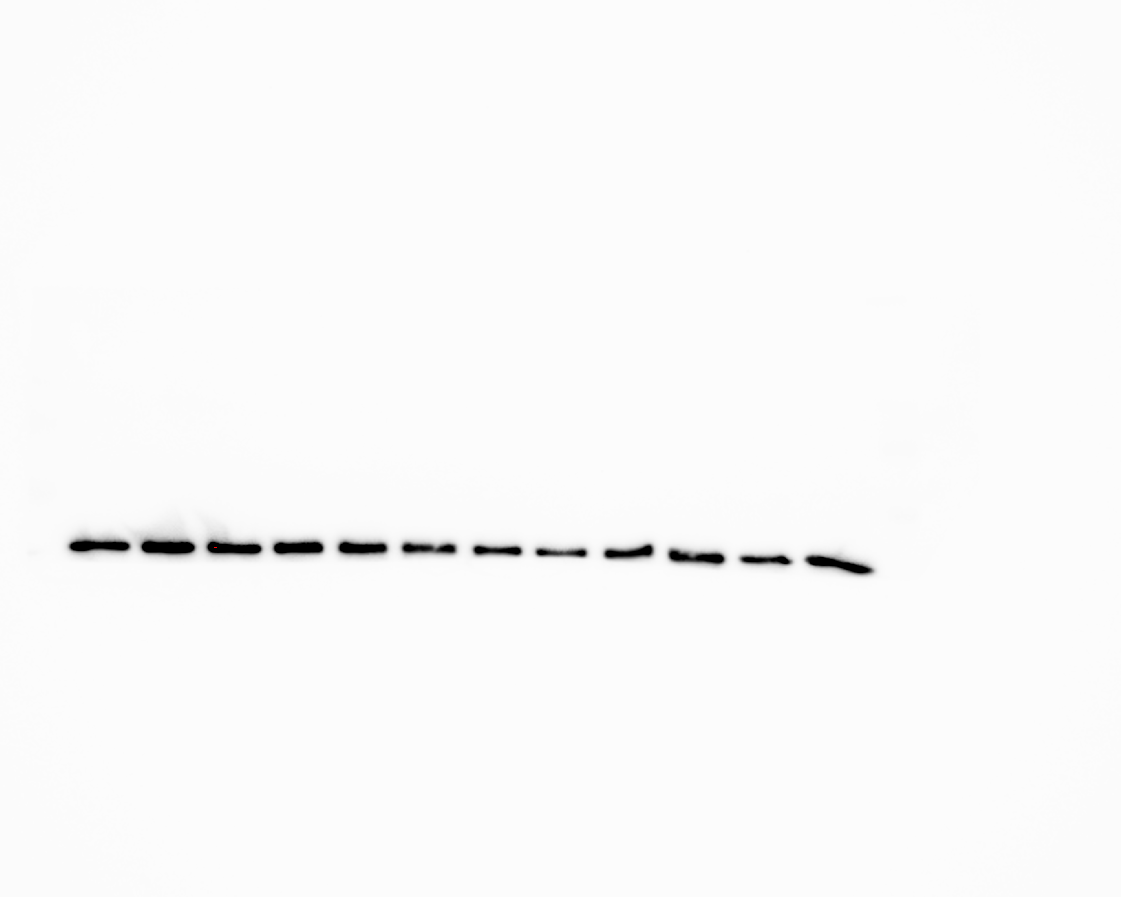


HMGB1 ~30 kDa

GAPDH ~45 kDa

**Figure 7. Inhibition of HIF1α and HMGB1 modulates the effects of BCAAs in BT2-LPS-stimulated RLMs.** RLMstreated with BCAAs (alone or as a mixture), LPS (100 ng/mL), and BT2 with the HMGB1 (Gla) or the HIF1α (DMOG) inhibitor.This figure shows the protein bands of HMGB1 and GAPDH.
